# Supplementary material for: An RNA Interference Lethality Screen of the Human Druggable Genome to Identify Molecular Vulnerabilities in Epithelial Ovarian Cancer
Source: PLoS One. 2012 Oct 9;7(10):e47086. doi: 10.1371/journal.pone.0047086 (PMC3467214; doi:10.1371/journal.pone.0047086)
Supplement: Table S4 — Average viability scores and viability indices across the eight tumorigenic and three non-tumorigenic cell lines following HTS of the 300 gene custom library. Genes highlighted in yellow were hits unique to the EOC cell lines and selected for further validation. NUF2 (highlighted in green) had the lowest Viability Index score and was also selected for further validation. (XLS) [file pone.0047086.s010.xls]

## Sheet: Avg viab. score EOCs and HIOs
Supplementary Table S4
Viability scores across each of the eight tumorigenic and three non-tumorigenic cell lines following HTS of the 300 gene custom library.
Genes highlighted in yellow were hits unique to the EOC cell lines and selected for further validation.
NUF2 (highlighted in green) had the lowest Viability Index score and was also selected for further validation.
LOCUS ID	NCBI GENE SYMBOL	Average EOC viability score	Standard Deviation		Average HIO Viability Score	Standard Deviation	Viability Index
83540	NUF2	0.558785	0.155575		0.783713	0.0458173	0.712997
6223	RPS19	0.584024	0.187778		0.789453	0.0811978	0.739782
10403	NDC80	0.731806	0.160003		0.954638	0.0493094	0.76658
6217	RPS16	0.55698	0.168516		0.700797	0.0777458	0.794782
3550	IK	0.540983	0.14954		0.669293	0.188823	0.80829
6168	RPL37A	0.523246	0.152187		0.642218	0.0842394	0.814749
6167	RPL37	0.502206	0.156447		0.608295	0.102535	0.825595
1659	DHX8	0.585848	0.197823		0.708078	0.0874908	0.827377
6135	RPL11	0.430907	0.126291		0.520683	0.0699255	0.82758
2197	FAU	0.478372	0.16189		0.567521	0.0663029	0.842914
6193	RPS5	0.478399	0.137775		0.565891	0.10839	0.845391
6134	RPL10	0.40383	0.165607		0.477159	0.108263	0.846322
1728	NQO1	0.611693	0.0912162		0.715982	0.0172951	0.854341
1053	CEBPE	0.670822	0.187686		0.782924	0.0676417	0.856817
9099	USP2	0.577335	0.13155		0.667416	0.0738709	0.865029
10135	NAMPT	0.713939	0.129348		0.823299	0.0636641	0.867168
8668	EIF3I	0.498574	0.151892		0.569326	0.113236	0.875727
4809	NHP2L1	0.535079	0.163127		0.610819	0.112301	0.876003
4660	PPP1R12B	0.659907	0.127649		0.751653	0.0818293	0.87794
5764	PTN	0.68682	0.166174		0.781785	0.120709	0.878528
6125	RPL5	0.509276	0.16917		0.579016	0.102268	0.879555
6232	RPS27	0.589797	0.200019		0.667374	0.143365	0.883757
8664	EIF3D	0.579503	0.150469		0.651139	0.0989683	0.889984
8993	PGLYRP1	0.681513	0.181009		0.75463	0.0756721	0.903108
9092	SART1	0.537136	0.158567		0.593078	0.160364	0.905676
6203	RPS9	0.515087	0.164744		0.562958	0.0944064	0.914966
3921	RPSA	0.51189	0.195981		0.557349	0.117889	0.918436
22938	SNW1	0.624331	0.14942		0.676488	0.0770487	0.9229
3309	HSPA5	0.627282	0.130881		0.677152	0.160363	0.926354
6187	RPS2	0.513904	0.190875		0.553462	0.0911051	0.928525
7311	UBA52	0.475594	0.120172		0.509579	0.0875816	0.933308
3646	EIF3E	0.549709	0.152169		0.58714	0.0497902	0.936249
8661	EIF3A	0.41488	0.165249		0.442185	0.0971469	0.938252
10291	SF3A1	0.576049	0.229805		0.613902	0.086088	0.938341
23481	PES1	0.579258	0.172579		0.612095	0.0920604	0.946353
6188	RPS3	0.442426	0.162896		0.464146	0.102444	0.953203
10594	PRPF8	0.463126	0.138257		0.481186	0.0625997	0.962468
4650	MYO9B	0.743958	0.0906373		0.760908	0.0252358	0.977723
8532	CPZ	0.648675	0.12983		0.652587	0.119935	0.994005
4780	NFE2L2	0.688917	0.160992		0.678124	0.0715177	1.01592
8412	BCAR3	0.640249	0.122748		0.629748	0.2468	1.01667
6227	RPS21	0.480798	0.207542		0.467152	0.0865956	1.02921
10370	CITED2	0.688271	0.10936		0.658614	0.132946	1.04503
8662	EIF3B	0.509556	0.183846		0.48256	0.0649278	1.05594
6191	RPS4X	0.455871	0.156979		0.43006	0.0918685	1.06002
6235	RPS29	0.420051	0.136418		0.388916	0.109822	1.08006
3832	KIF11	0.338168	0.114214		0.307444	0.0904443	1.09993
6830	SUPT6H	0.500509	0.160565		0.450595	0.0941565	1.11077
3596	IL13	0.73664	0.0998869		0.638834	0.201077	1.1531
80824	DUSP16	0.655493	0.167068		0.523449	0.109673	1.25226
64783	RBM15	0.750514	0.106156		0.584096	0.11561	1.28491
6651	SON	0.49802	0.199776		0.254309	0.042757	1.95833
5430	POLR2A	0.338606	0.171908		0.149594	0.0200817	2.26351
