# Supplementary material for: An RNA Interference Lethality Screen of the Human Druggable Genome to Identify Molecular Vulnerabilities in Epithelial Ovarian Cancer
Source: PLoS One. 2012 Oct 9;7(10):e47086. doi: 10.1371/journal.pone.0047086 (PMC3467214; doi:10.1371/journal.pone.0047086)
Supplement: Table S5 — List of 28 siRNAs used in the deconvolution screen purchased from Qiagen. Each well contains a single siRNA duplex targeting the indicated gene. The siRNAs are arrayed into a single 96-well plate. The two most effective siRNAs are highlighted in green. (XLS) [file pone.0047086.s011.xls]

## Sheet: Flexiplate 250 pmol SO 2547871
Supplementary Table S5
List of 28 siRNAs used in the deconvolution screen. All siRNAs were purchased from Qiagen.
Each well contains a single siRNA duplex targeting the indicated gene. The siRNA sequences are arrayed into a single 96-well plate.
The two most effective siRNAs are highlighted in green
LOCUS ID	NCBI GENE SYMBOL	mRNA ACCESSION	siRNA TARGET SEQUENCE	PRODUCT ID	PRODUCT NAME
8412	BCAR3	NM_003567	CCGAGCGGCCACTCTGAGTAA	SI03080196	Hs_BCAR3_5
8412	BCAR3	NM_003567	AAGGTATCAGTTATATGATAT	SI00053095	Hs_BCAR3_2
8412	BCAR3	NM_003567	GCCCAACGAGTTTGAGTCAAA	SI00053102	Hs_BCAR3_3
8412	BCAR3	NM_003567	CCGGAACTCTGGCGTCAACTA	SI03081603	Hs_BCAR3_6
3309	HSPA5	NM_005347	TAGGGTGTGTGTTCACCTTCA	SI02780554	Hs_HSPA5_6
3309	HSPA5	NM_005347	CAAGCCCAATACAGCCATTAA	SI00075922	Hs_HSPA5_1
3309	HSPA5	NM_005347	AACTGTTACAATCAAGGTCTA	SI00075929	Hs_HSPA5_2
3309	HSPA5	NM_005347	TGGGATAAGGAAACACTTCTA	SI02781016	Hs_HSPA5_7
10135	NAMPT	NM_005746	TTGTTCAGTCCTGGTATCCAA	SI03025897	Hs_PBEF1_5
10135	NAMPT	NM_005746	ATGGGTTGCAGTACATTCTTA	SI00080850	Hs_PBEF1_3
10135	NAMPT	NM_005746	TACAAGGTTACTCACTATAAA	SI00080836	Hs_PBEF1_1
10135	NAMPT	NM_005746	CAGAGTGTTACTGGCTTACAA	SI03064432	Hs_PBEF1_6
10403	NDC80	NM_006101	CCGAGACCACTTAATGACAAA	SI02653224	Hs_KNTC2_6
10403	NDC80	NM_006101	ATGAATTGCAGCAGACTATTA	SI00084532	Hs_KNTC2_3
10403	NDC80	NM_006101	TCCAAAGGTTATGACTTTGAA	SI00084525	Hs_KNTC2_2
10403	NDC80	NM_006101	TCCCTGGGTCGTGTCAGGAAA	SI02653567	Hs_KNTC2_7
83540	NUF2	NM_031423 NM_145697	CACAGTAATTGAGGATTGCAA	SI00140637	Hs_CDCA1_2
83540	NUF2	NM_031423 NM_145697	CAGGAGCTACAACAATCACTA	SI00140630	Hs_CDCA1_1
83540	NUF2	NM_031423 NM_145697	AAGATACGGTCCAGAAGCTTA	SI03032141	Hs_CDCA1_7
83540	NUF2	NM_031423 NM_145697	AAGCATGCCGTGAAACGTATA	SI00140644	Hs_CDCA1_3
5764	PTN	NM_002825	CAGTGAGTCATCCGTCCAGAA	SI03073049	Hs_PTN_5
5764	PTN	NM_002825	CTGACCAAGCCCAAACCTCAA	SI03093083	Hs_PTN_6
5764	PTN	NM_002825	CTGGAGCTGAGTGCAAGCAAA	SI00043764	Hs_PTN_3
5764	PTN	NM_002825	TACCGTAGGCTTTGTATTCAA	SI00043750	Hs_PTN_1
6223	RPS19	NM_001022	TCCAGCCACGAACGACGCAAA	SI03113649	Hs_RPS19_8
6223	RPS19	NM_001022	CTCTCTATCCTCTCTCTATTA	SI03092460	Hs_RPS19_6
6223	RPS19	NM_001022	CCCGACTTGTGCGCCCGGGAA	SI03077522	Hs_RPS19_5
6223	RPS19	NM_001022	TACCGTCAAGCTGGCCAAGCA	SI03109078	Hs_RPS19_7
